# Supplementary material
Source: publisher site journal article supplement (https://www.dovepress.com/article/573709)
Supplement: Supplementary file 1 [file 573709%20Supplementary%20Figure%201.docx]

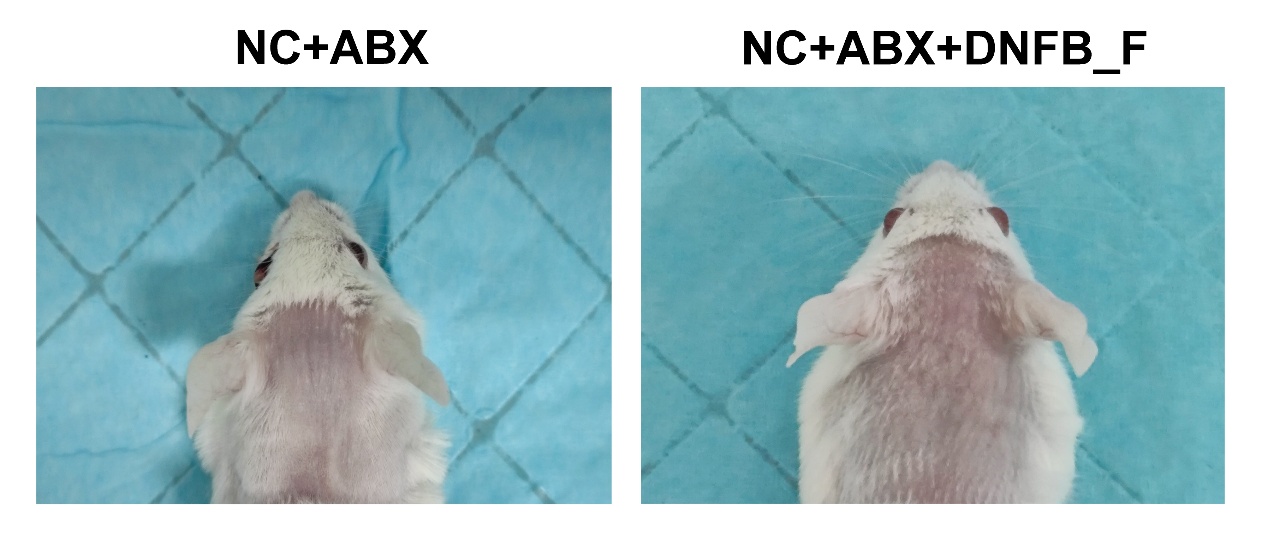


**Supplementary Figure.S1** Fecal microbiota transplantation from mice with chronic itch has no effect on the skin of healthy mice.
